# Supplementary material for: MicroXRF tomographic visualization of zinc and iron in the zebrafish embryo at the onset of the hatching period
Source: Royal Society of Chemistry journal article supplement (doi:10.1039/c6mt00073h), 2016-01-01
Supplement: c6mt00073h1.pdf [file c6mt00073h1.pdf]

## Supporting Information for

### **MicroXRF tomographic visualization of zinc and iron in the zebrafish embryo at the onset of the hatching period**

Daisy Bourassa,<sup>a</sup> Sophie-Charlotte Gleber,<sup>b</sup> Stefan Vogt,<sup>b</sup> Hong Yi,<sup>c</sup>

Chong Hyun Shin,<sup>d</sup> and Christoph J. Fahrni\*<sup>a</sup>

*<sup>a</sup>School of Chemistry and Biochemistry and Petit Institute for Bioengineering and Bioscience, Georgia Institute of Technology, 901 Atlantic Drive, Atlanta, GA 30332, USA. <sup>b</sup>Advanced Photon Source, X-ray Science Division, Argonne National Laboratory, 9700 S. Cass Avenue, Argonne, IL 60439, USA. <sup>c</sup>Robert P. Apkarian Integrated Electron Microscopy Core, Emory University, 1521 Dickey Drive, Atlanta, GA 30322, USA. <sup>d</sup>School of Biology and Petit Institute for Bioengineering and Bioscience, Georgia Institute of Technology, 315 Ferst Drive, Atlanta, GA 30332, USA*

## Sample Preparation Protocol

Zebrafish embryos were anaesthetized at 48 hours-post-fertilization in 0.02% Tricaine (Sigma, E10521), manually dechorionated, and fixed for 2 hours at room temperature with a 4% paraformaldehyde in 0.1 M sodium phosphate buffer (PBS). After removing the fixative, the specimens were washed with PBS and transferred to disposable aluminum foil dishes. Embedding in Lowicryl K4M resin was performed according to the progressive lowering of temperature (PLT) method developed by Carlemalm *et al.* in 1982.<sup>1,2</sup> This technique involves dehydration with increasing concentrations of ethanol while progressively lowering the temperature from 0 °C to -35 °C. Specifically, the following steps were employed:

| <b>Ethanol<br/>(Vol/%)</b> | <b>Temperature<br/>(°C)</b> | <b>Time<br/>(min)</b> |
|----------------------------|-----------------------------|-----------------------|
| 30                         | 0                           | 30                    |
| 50                         | -20                         | 60                    |
| 70                         | -35                         | 60                    |
| 95                         | -35                         | 60                    |
| 100                        | -35                         | 60                    |
| 100                        | -35                         | 60                    |

Subsequent infiltration with Lowicryl K4M resin and UV-mediated polymerization (360 nm) was performed according to the following protocol:

| <b>K4M : Ethanol<br/>(Vol : Vol)</b> | <b>Temperature<br/>(°C)</b> | <b>Time<br/>(min)</b> |
|--------------------------------------|-----------------------------|-----------------------|
| 1:1                                  | -35                         | 60                    |
| 2:1                                  | -35                         | 60                    |
| pure K4M                             | -35                         | 60                    |
| pure K4M                             | -35                         | overnight             |
| UV polymerization                    | -35                         | 24 hrs                |
| UV polymerization                    | 0                           | 12 hrs                |

## Attenuation Correction Based on Linear Scaling Factors

The Lowicryl resin used for embedding the specimen results in attenuation of both the excitation and fluorescence emission intensities in an energy-dependent manner. To compensate for the loss of photons due to matrix absorption, element specific linear scaling factors were derived and applied as follows:

According to the Beer-Lambert law (S1), the intensity  $I$  of the X-ray beam is attenuated as a function of the path length  $l$  in an exponential fashion with

$$I = I_0 \cdot e^{-l\mu} \quad (\text{S1})$$

where  $I_0$  corresponds to the incident beam intensity, and  $\mu$  is the energy-dependent linear attenuation coefficient of the material. As the angular position of the specimen relative to the incident beam and emission detector is different for each tomographic projection, attenuation of the excitation and emission intensities for a given volume element will vary accordingly. For a cylindrically shaped matrix with diameter  $l$ , the attenuation of photons emitted at the center of rotation remains constant throughout all angular positions, and the intensity  $I$  of the emitted photons can be expressed as the geometric mean according to equation (S2)

$$I = I_0 \cdot e^{-\frac{l}{2}(\mu_{ex} + \mu_{em})} \quad (\text{S2})$$

where  $\mu_{ex}$  and  $\mu_{em}$  are the linear attenuation coefficients for the material at the respective excitation and emission energies. To compensate for the attenuation of photons emitted at the axis of rotation, it would be thus sufficient to apply a linear scaling factor  $f$  according to equation (S3)

$$f = e^{\frac{l}{2}(\mu_{ex} + \mu_{em})} \quad (\text{S3})$$

As with increasing distance from the rotation axis, the difference between actual and approximated elemental concentrations would scale exponentially, a simple linear attenuation correction offers only a useful approximation if the matrix exhibits a rather uniform shape and is characterized by short path lengths and small attenuation coefficients at the emission energies of the elements of interest. Concluding from previous attenuation simulations, which assumed a phantom embedded within a polymethyl methacrylate (PMMA) matrix with square-shaped cross section, the attenuation-corrected concentrations of Zn, Cu, and Fe for this size of specimens should be accurate within an error margin of 20% or better.<sup>3</sup>

## Concentration Profiles of Zn and Fe Across the Yolk Region

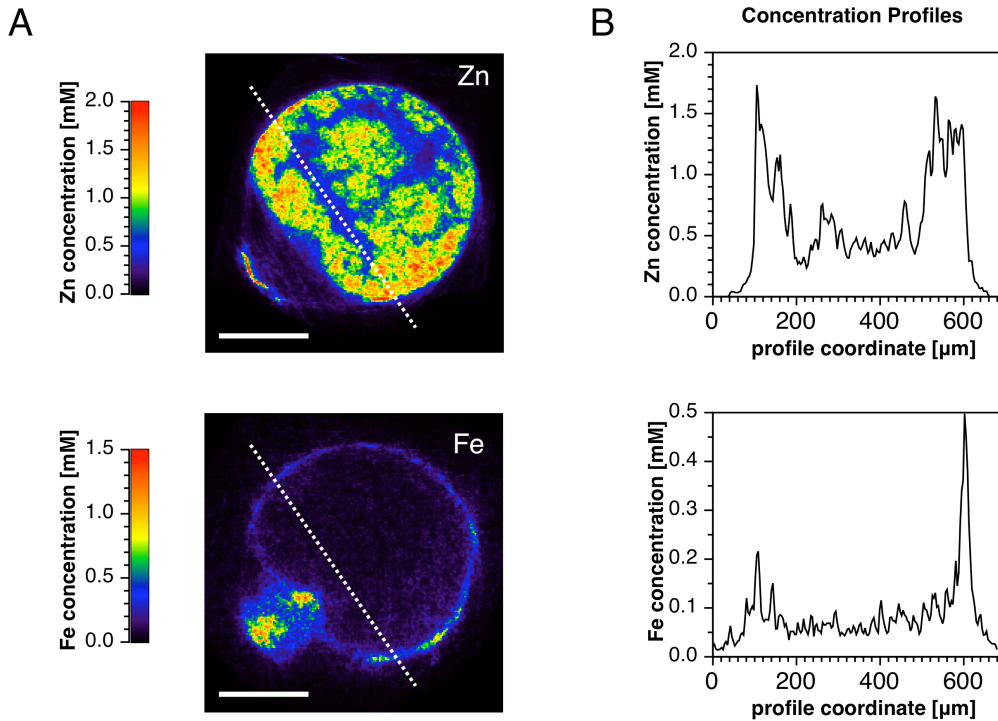

**Figure S1:** Estimated Zn and Fe concentrations in the yolk regions according to the reconstructed elemental densities using the iterative maximum likelihood expectation maximization (MLEM) algorithm. A. False-color concentration map. B. Concentration profile along the image traces indicated with dashed lines in panel A. Scale bar: 200  $\mu\text{m}$ .

### References:

- (1) Armbruster, B. L.; Carlemalm, E.; Chiovetti, R.; Garavito, R. M.; Hobot, J. A.; Kellenberger, E.; Villiger, W., "Specimen preparation for electron microscopy using low temperature embedding resins", *J. Microsc.* **1982**, *126*, 77-85.
- (2) Carlemalm, E.; Garavito, R. M.; Villiger, W., "Resin development for electron microscopy and an analysis of embedding at low temperature\*", *J. Microsc.* **1982**, *126*, 123-143.
- (3) Bourassa, D.; Gleber, S.-C.; Vogt, S.; Yi, H.; Will, F.; Richter, H.; Shin, C. H.; Fahrni, C. J., "3D imaging of transition metals in the zebrafish embryo by X-ray fluorescence microtomography", *Metallomics* **2014**, *6*, 1648-1655.
